# Supplementary material for: The Pulmonary Endothelial Glycocalyx Modifications in Glypican 1 Knockout Mice Do Not Affect Lung Endothelial Function in Physiological Conditions
Source: MDPI journal article supplement (doi:10.3390/ijms241914568), 2023-09-26
Supplement: s1 [file s1]

## Supplementary Materials

**The pulmonary endothelial glycocalyx modifications in glypican 1 knockout mice do not affect lung endothelial function in physiological conditions.**

Lakshmi N R Thota<sup>1</sup>, Joaquin L Rosales<sup>1</sup>, Ivan Placencia<sup>1</sup>, Evgeny A Zemskov<sup>3,4</sup> Paola Tonino<sup>5</sup>, Ashley N. Michael<sup>6</sup>, Stephen M Black<sup>3,4,8</sup> Andreia Z Chignalia<sup>1,2,7, 9\*</sup>

Original Membranes

Western Blot

Figure 1B Lung Lysates (Representative images figure 1B in blue boxes)

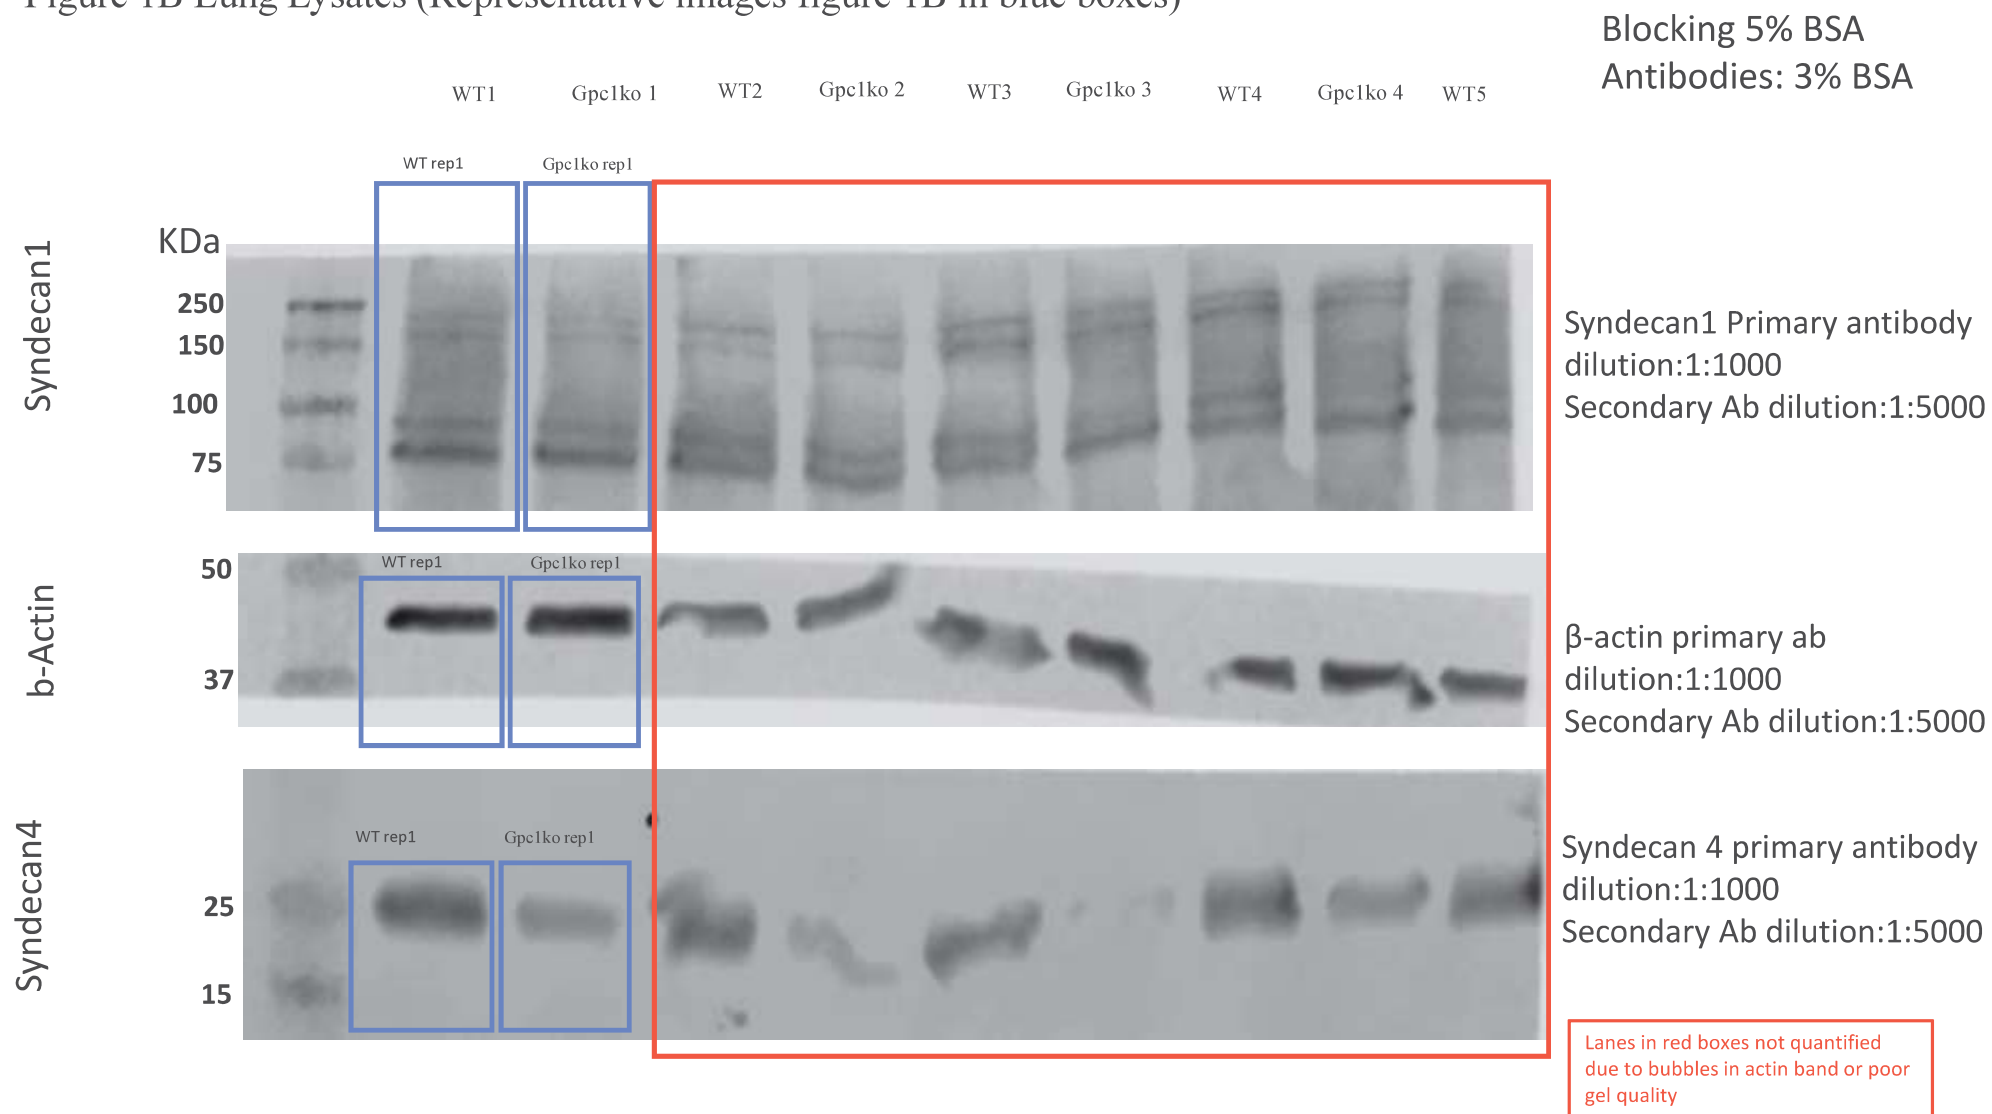

# Lung Lysates (Representative images Figure 1 B in blue boxes )

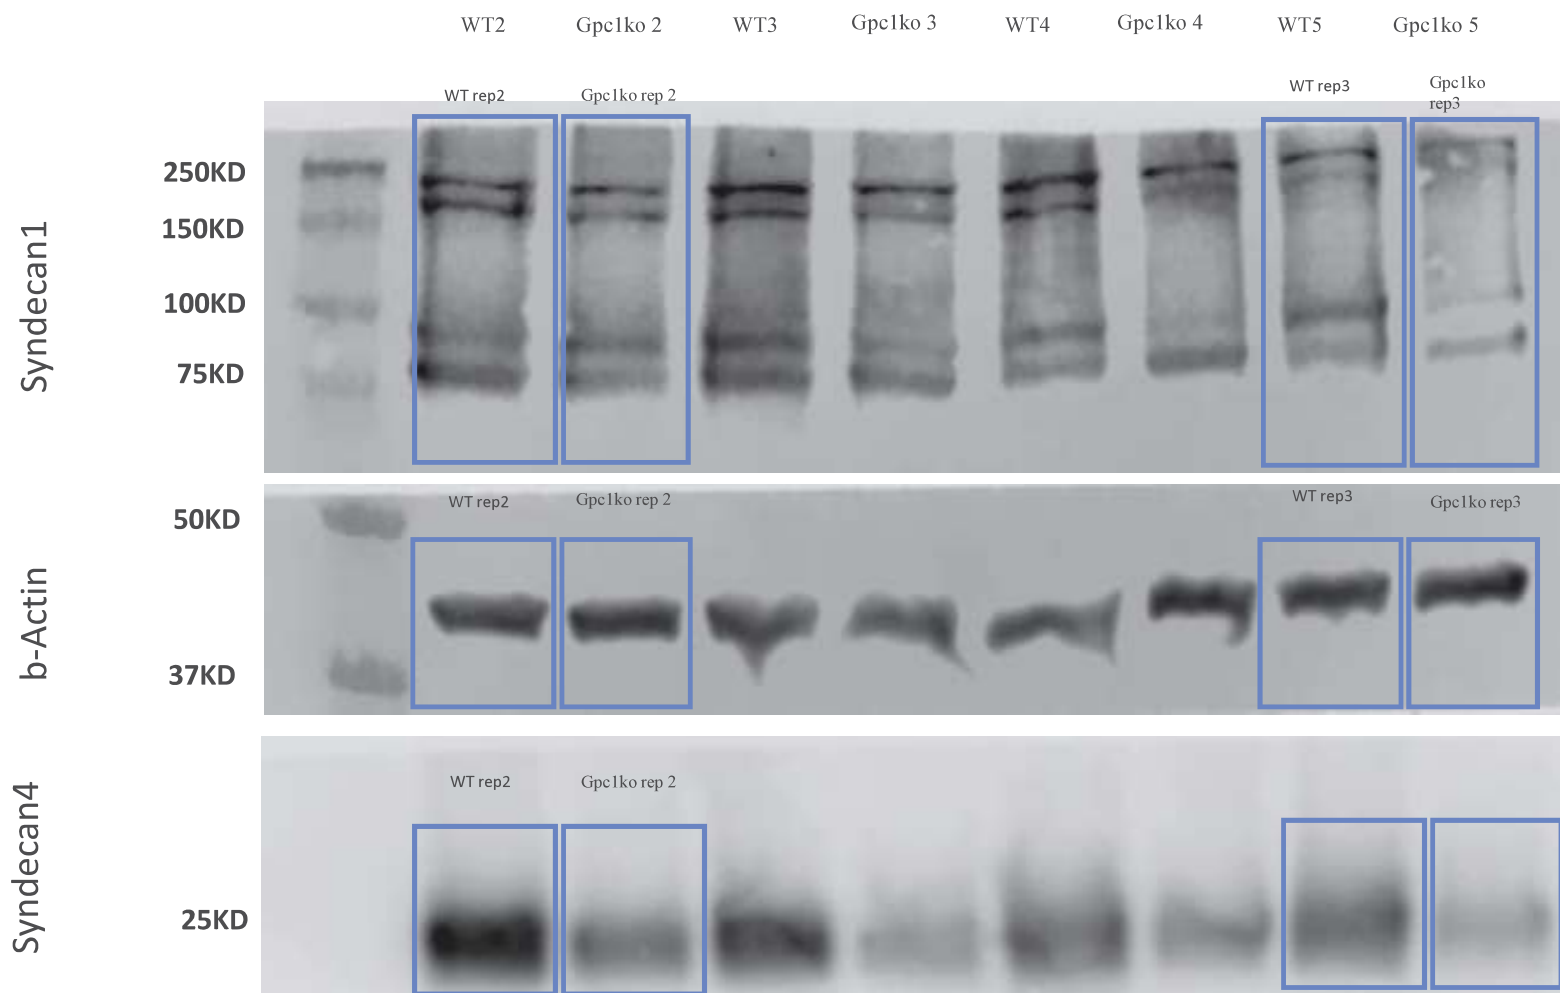

Blocking 5% BSA  
Antibodies: 3% BSA

Syndecan1 Primary antibody  
dilution:1:1000  
Secondary Ab dilution:1:5000

$\beta$ -actin primary ab  
dilution:1:1000  
Secondary Ab dilution:1:5000

Syndecan 4 primary antibody  
dilution:1:1000  
Secondary Ab dilution:1:5000

Figure 3A Lung Lysates (Representative images figure 3A)

Blocking 5% BSA  
Antibodies: 3% BSA

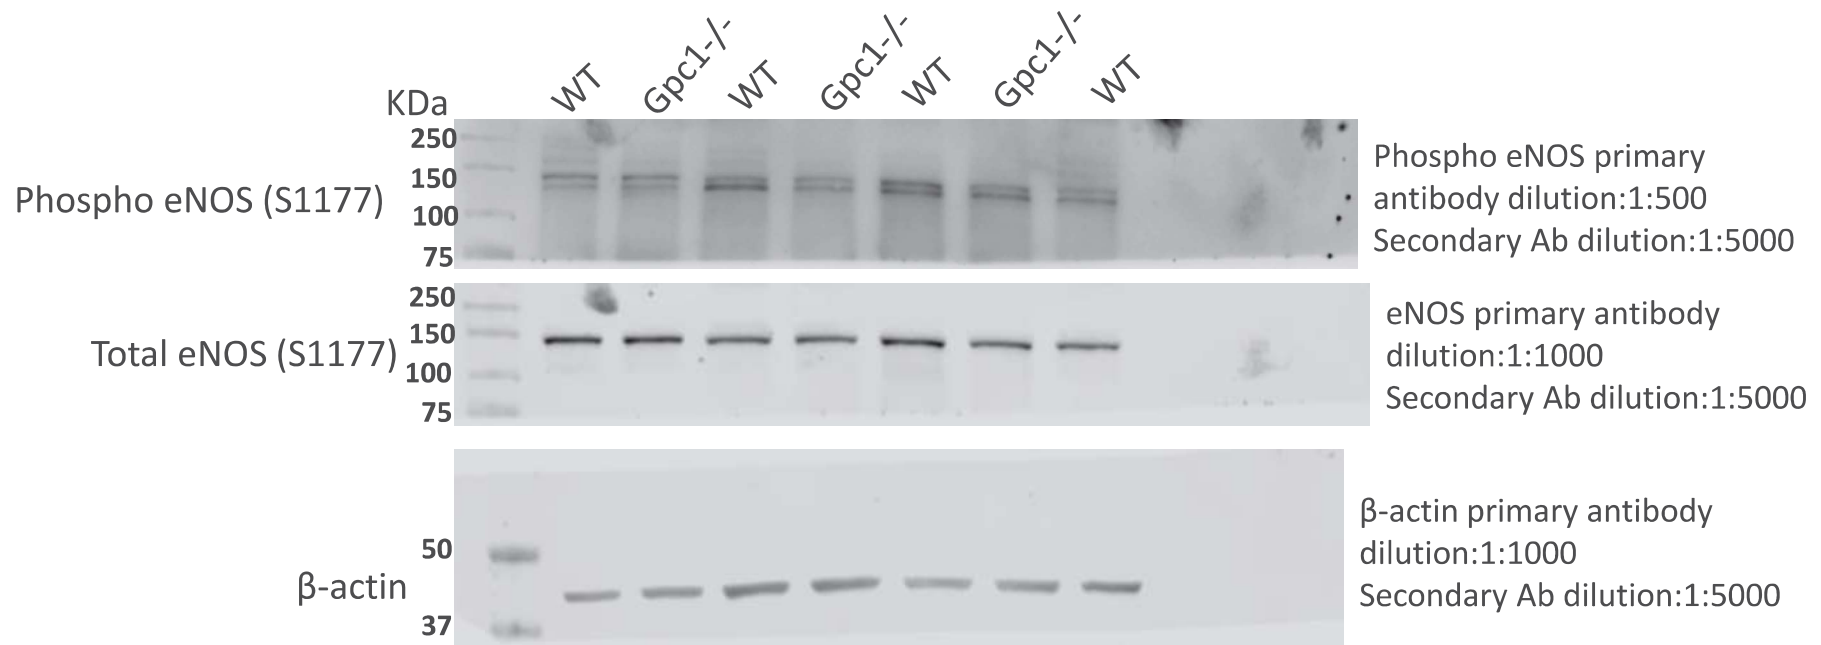

Figure 3E Lung Lysates (Representative images figure 3E are in the blue box)

Blocking 5% BSA  
Antibodies: 3% BSA

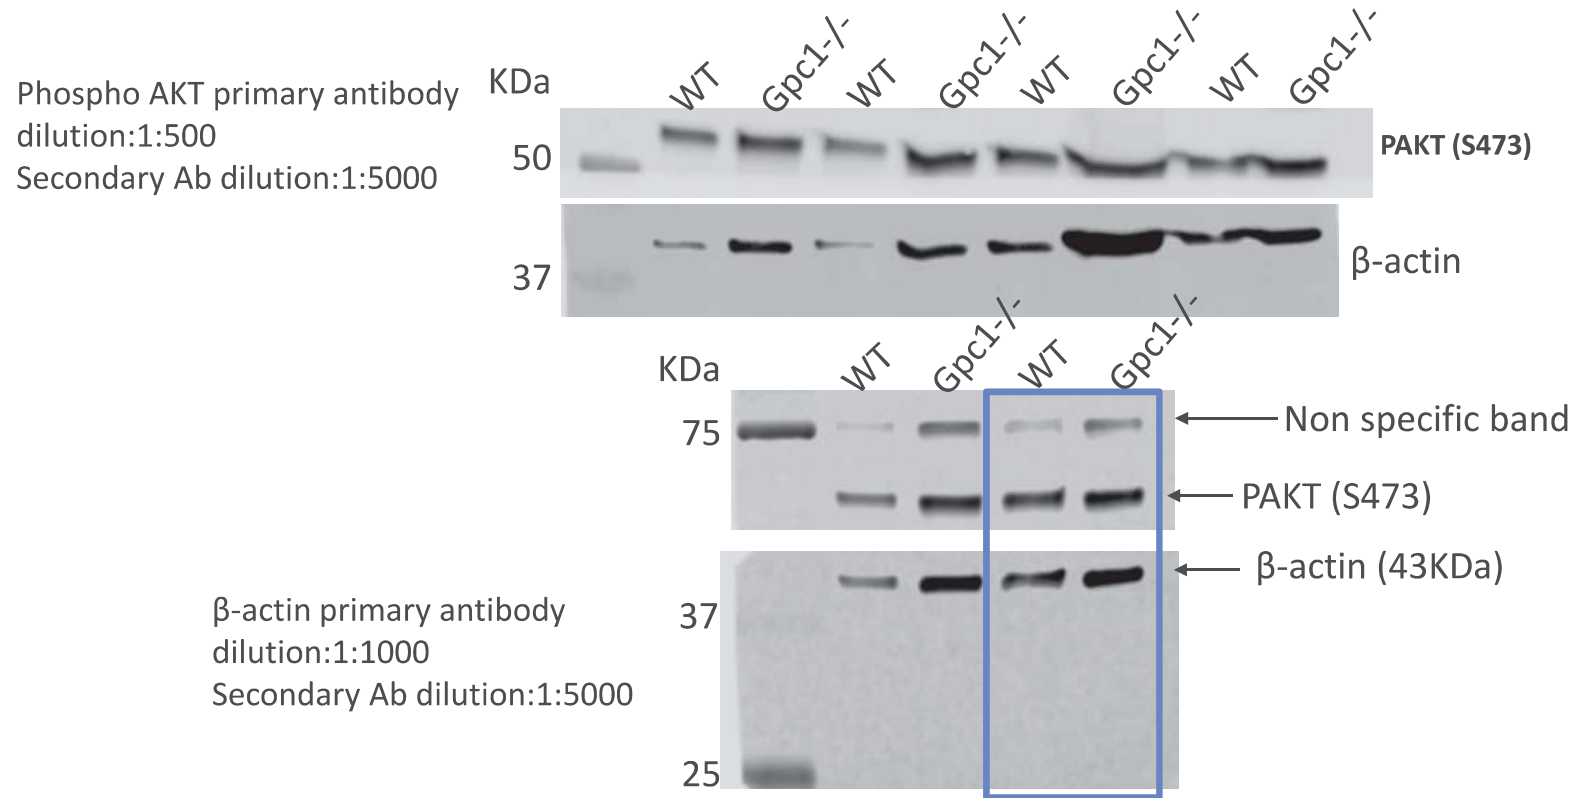

## Supplementary material

Immunofluorescence – negative controls

Negative Control

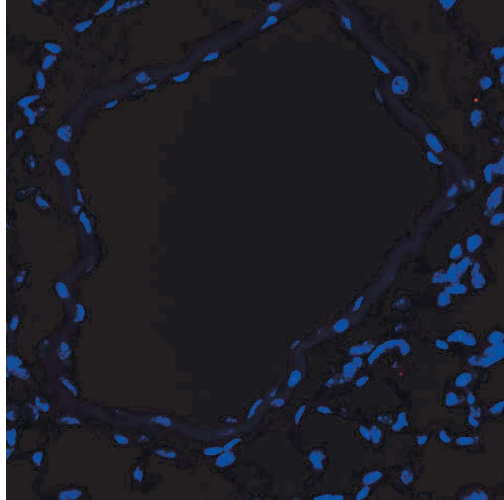

WT

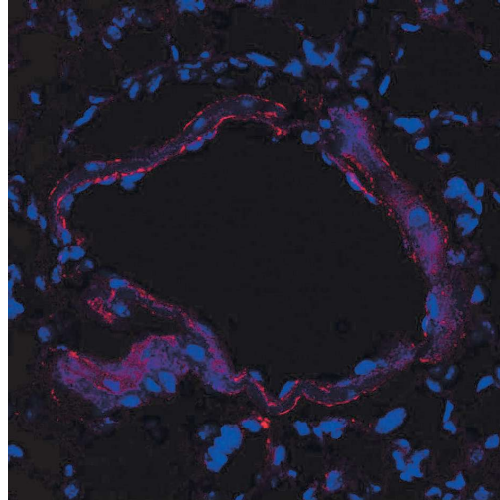

Gpc1<sup>-/-</sup>

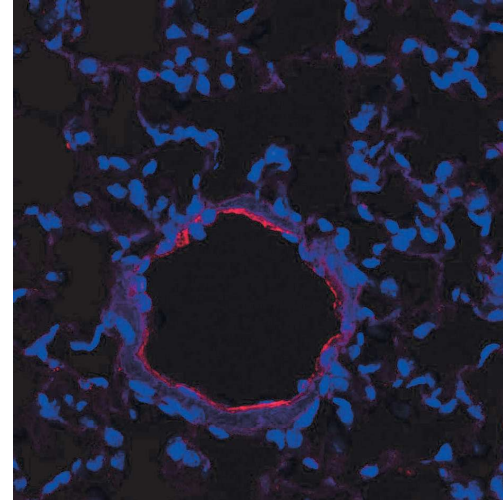

Heparan Sulfate  
DAPI

Negative Control

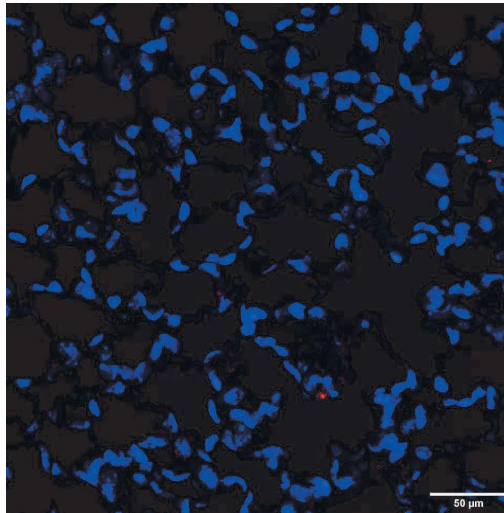

WT

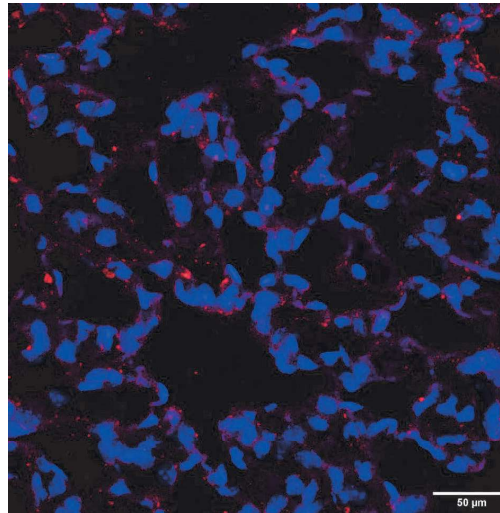

Gpc1<sup>-/-</sup>

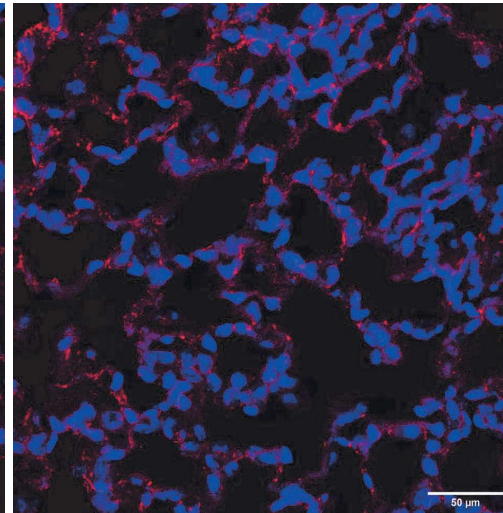

Representative  
images and  
corresponding  
negative control  
images for Figure 2

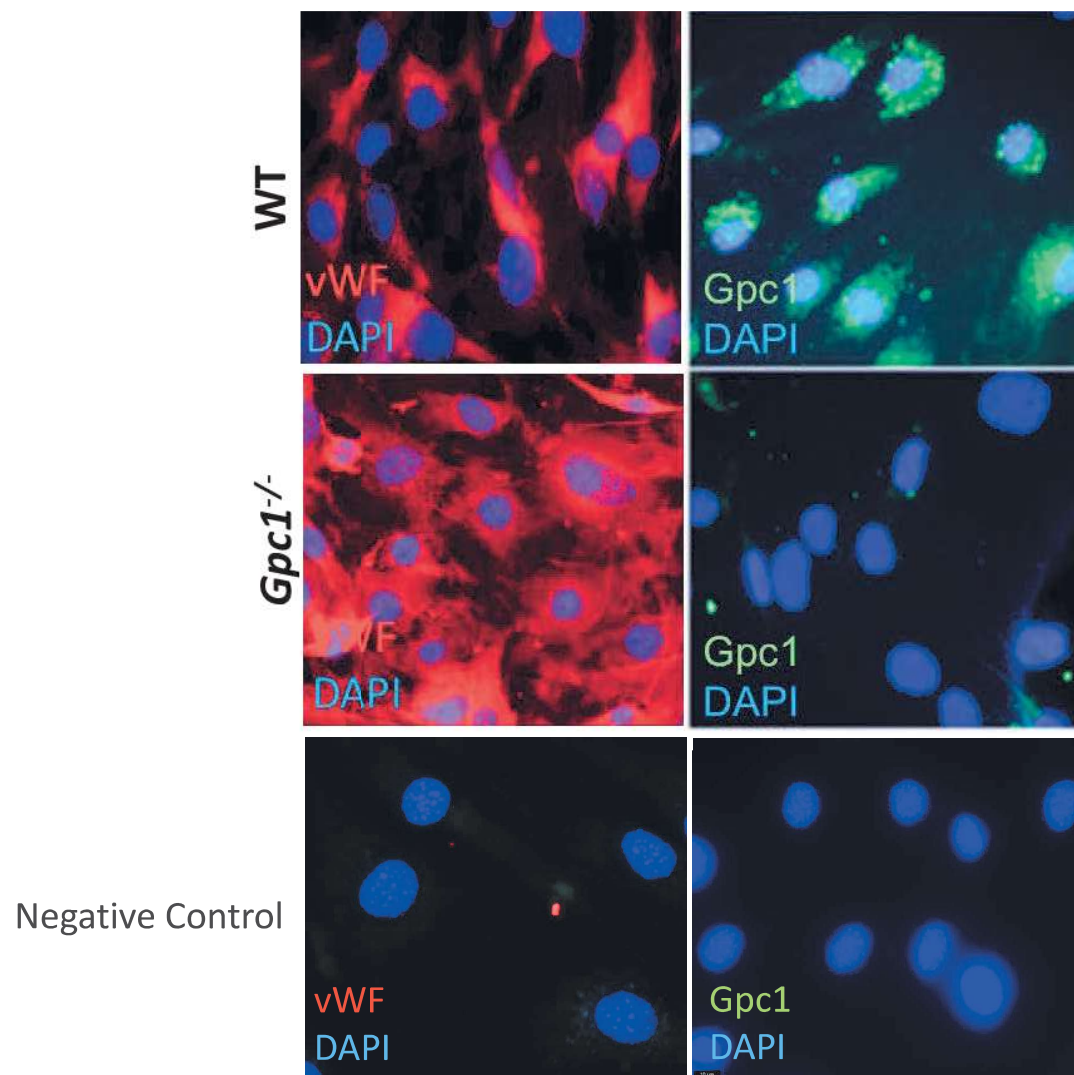

Representative images and corresponding negative control images for Figure 4



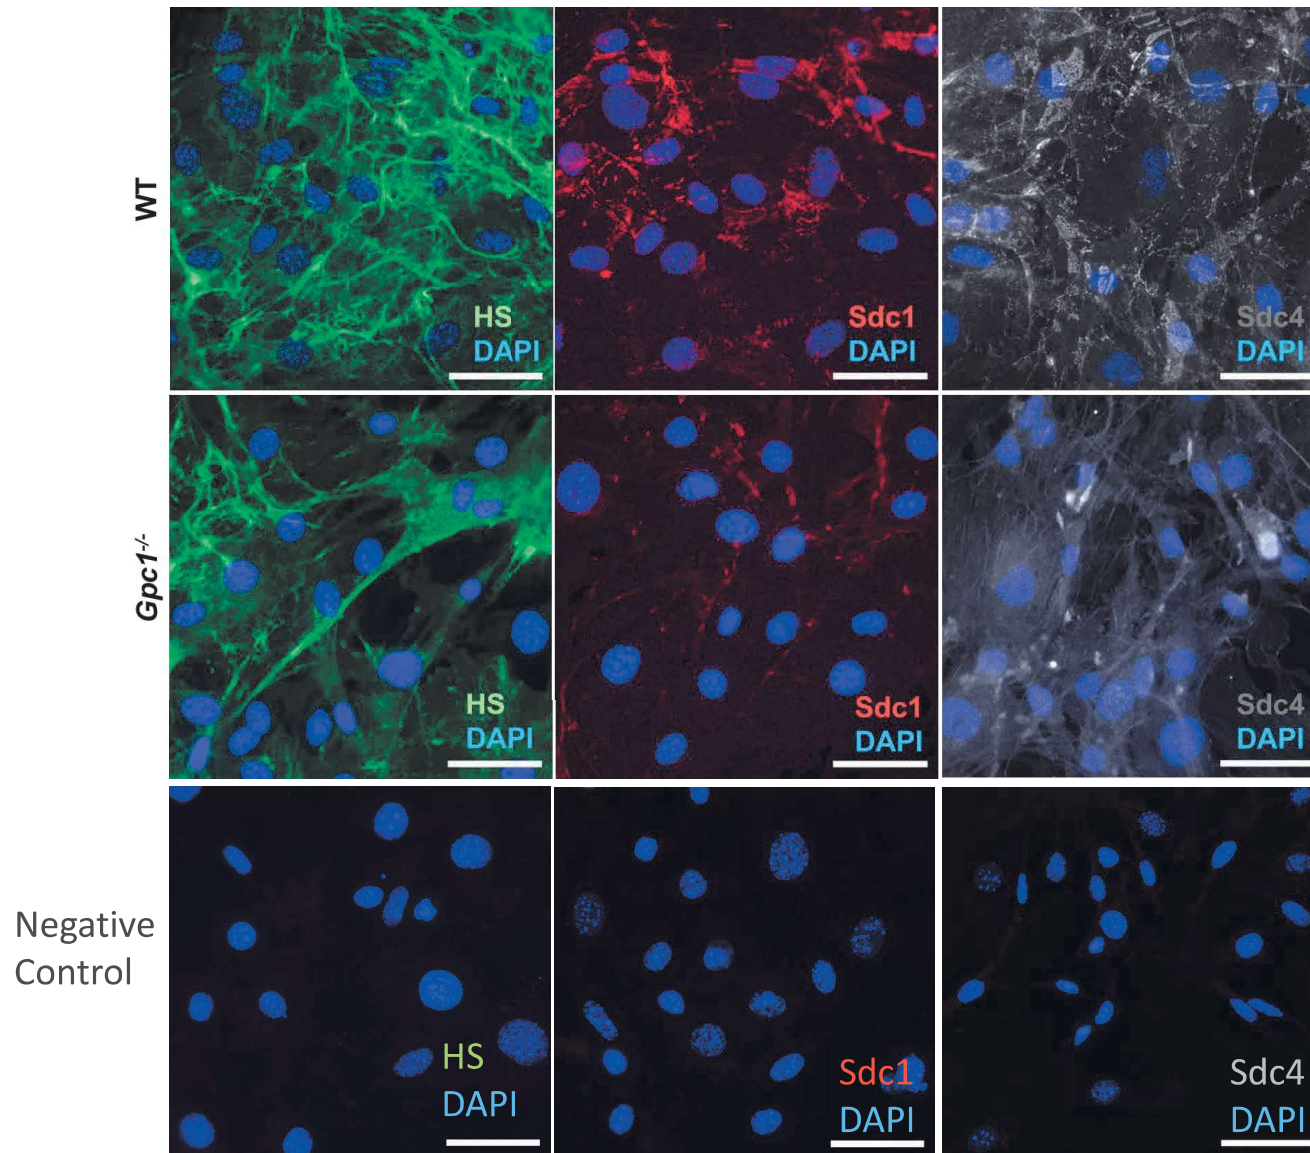

Representative images and corresponding negative control images for Figure 4
